# Supplementary material
Source: HighWire-hosted journal article supplement (http://www.qdcxjkg.com/highwire/filestream/113395/field_highwire_adjunct_files/0/pattypm10symplungf_onlinesupplement_revision2.pdf)
Supplement: pattypm10symplungf_onlinesupplement_revision2.pdf [file pattypm10symplungf_onlinesupplement_revision2.pdf]

## Online supplement

### PM<sub>10</sub> and children's respiratory symptoms and lung function in the PATY study

Gerard Hoek<sup>1</sup>, Sam Pattenden<sup>2</sup>, Saskia Willers<sup>1</sup>, Temenuga Antova<sup>3</sup>, Eleonora Fabianova<sup>4</sup>, Charlotte Braun-Fahrländer<sup>5,6</sup>, Francesco Forastiere<sup>7</sup>, Ulrike Gehring<sup>1,8</sup>, Heike Luttmann-Gibson<sup>9</sup>, Leticia Grize<sup>5,6</sup>, Joachim Heinrich<sup>8</sup>, Danny Houthuijs<sup>10</sup>, Nicole Janssen<sup>1,10</sup>, Boris Katsnelson<sup>11</sup>, Anna Kosheleva<sup>11</sup>, Hanns Moshhammer<sup>12</sup>, Manfred Neuberger<sup>12</sup>, Larisa Privalova<sup>11</sup>, Peter Rudnai<sup>13</sup>, Frank Speizer<sup>9</sup>, Hana Slachtova<sup>14</sup>, Hana Tomaskova<sup>14</sup>, Renata Zlotkowska<sup>15</sup>, Tony Fletcher<sup>2</sup>

- 1 Institute for Risk Assessment Sciences (IRAS), Utrecht University, Utrecht, the Netherlands
- 2 London School of Hygiene and Tropical Medicine, London, United Kingdom
- 3 Environmental Health unit, NCPHP Sofia, Bulgaria
- 4 Regional Authority of Public Health, Banska Bystrica, Slovak Republic
- 5 Swiss Tropical and Public Health Institute, Basel, Switzerland
- 6 University of Basel, Basel, Switzerland
- 7 Department of Epidemiology, ASL Rome, Italy
- 8 Helmholtz Zentrum München, Institute of Epidemiology, Neuherberg, Germany
- 9 Department of Environmental Health, Harvard School of Public Health, Boston, MA, USA
- 10 National Institute Public Health and the Environment (RIVM), Bilthoven, the Netherlands
- 11 Ural Regional Centre for Environmental Epidemiology, Ekaterinburg, Russia
- 12 Institute of Environmental Health, Medical University of Vienna, Vienna, Austria
- 13 National Institute of Environmental Health, "Fodor Jozsef" National Center for Public Health, Budapest, Hungary
- 14 Institute of Public Health, Center of Health Services, Ostrava, Czech Republic
- 15 Epidemiology Department, Institute of Occupational Medicine and Environmental Health, Sosnowiec, Poland

The online supplement contains in order:

1. More specific explanation of exposure assessment
2. Tables 1 – 2 with more detail on methods of exposure assessment
3. Tables 3 -6 additional PM<sub>10</sub> effect estimates not in the main text
4. References for the supplement

## METHODS

### Exposure assessment

Exposure assessment methods were assessed for comparability, including an evaluation of site selection for the monitors and the monitoring methods, especially for particulate matter. Tables 1 and 2 present the details for the included studies. In the evaluation it was taken into account that in the epidemiological analysis, analyses of the relationships between air pollution and respiratory health were made per country. Hence modest systematic differences in exposure assessment between studies do not directly affect the effect estimates. Although the overall conclusion was that exposure assessment was sufficiently comparable to allow summarizing air pollution effect estimates given a specific study design, some components of the studies were excluded from the analysis:

- Italian particle data, as a different fraction than PM<sub>10</sub> was measured using different methods within the study, for which insufficient collocation with PM<sub>10</sub> monitors existed
- One of the original four Bulgarian study areas was excluded because measurements used to representing an entire quarter of the city were made at a curbside of a major road
- One of the Russian study areas was excluded because the monitor was located on the premises of a major industrial site and too far away from the study area. A correlation analysis of daily samples supported this exclusion, as the PM concentrations from the excluded site did not correlate with other sites, whereas significant correlations were present among the other sites
- For some of the Austrian and Swiss sites recommendations were made to test the sensitivity of the epidemiological associations for presence of these sites, because there were concerns that these sites were too much affected by traffic on the nearest road

For those studies that did not directly measure PM<sub>10</sub> with gravimetric methods, conversion factors were derived. In the Netherlands, PM<sub>2.5</sub> was measured at all 24 schools. At some of the sites, PM<sub>2.5</sub> measurements were co-located with PM<sub>10</sub> measurements during the study. Therefore, PM<sub>2.5</sub> could be converted into PM<sub>10</sub> using the formula:  $PM_{10} = 9.37 + 1.21 * PM_{2.5}$  ( $R^2 = 0.93$ ). (Janssen, 2001)<sup>1</sup>. In the German and Austrian study, TSP (total suspended particles) was measured in a

routine monitoring network with beta attenuation continuous monitors. Site-specific comparisons were made with actual PM<sub>10</sub> measurements shortly after the study, thus the original particle concentration could be transformed into PM<sub>10</sub> concentrations. In Germany, the average PM<sub>10</sub>/TSP was 0.77. In Austria, the average PM<sub>10</sub>/TSP ratio was 0.77, 0.93 and 0.94 at three sites used in the current study.

We further recalculated the annual averages for the Russian study from the original daily data because in some areas the study period was shorter than the full year, resulting in potential bias in the exposure estimates because of seasonal variation. We used the average ratio of the annual average for the sites with complete study periods to the more restricted period to make adjustments.

**Table S1 Overview of exposure assessment**

| Center      | Data source                                                               | Assignment                                  | Monitoring sites        | Temporal coverage PM <sub>10</sub> /TSP                | Temporal coverage gases              | Particle fraction   | Particle composition                                               | Other pollutants                                        |
|-------------|---------------------------------------------------------------------------|---------------------------------------------|-------------------------|--------------------------------------------------------|--------------------------------------|---------------------|--------------------------------------------------------------------|---------------------------------------------------------|
| Switzerland | <i>Gases</i> : routine network<br><i>PM<sub>10</sub></i> : study specific | 1 fixed site in each community <sup>A</sup> | Background/traffic      | Weekly samples; 50/year                                | Continuous monitor, entire year      | PM <sub>10</sub>    |                                                                    | SO <sub>2</sub> , NO <sub>2</sub> , O <sub>3</sub>      |
| Austria     | Routine network                                                           | School assigned to nearest monitor          | Background <sup>B</sup> | Continuous monitor, entire year                        | Continuous monitor, entire year      | TSP                 |                                                                    | SO <sub>2</sub> , NO <sub>2</sub> , O <sub>3</sub> , CO |
| CESAR       | Study specific                                                            | 1 fixed site in each community              | Background              | Daily samples; 1 per 6 days, one year                  | NA                                   | PM <sub>10</sub>    | PM <sub>2.5</sub> , soot                                           | -                                                       |
| Germany     | Routine network                                                           | 1 fixed site in each community              | Background/industrial   | Continuous monitor, entire year                        | Continuous monitor, entire year      | TSP                 | --                                                                 | SO <sub>2</sub>                                         |
| Italy       | Routine networks                                                          | Schools within 1 km of a monitor            | Background/traffic      | Continuous monitor, entire year                        | Continuous monitor, entire year      | SP/PM <sub>10</sub> |                                                                    | SO <sub>2</sub> , NO <sub>2</sub>                       |
| Netherlands | Study specific                                                            | 1 fixed site per school                     | Traffic                 | Weekly samples; 5-10 per year                          | Weekly samples; 5-10 per year        | PM <sub>2.5</sub>   | Soot                                                               | NO <sub>2</sub> , VOC                                   |
| Russia      | Study specific                                                            | 1 fixed site per study area                 | Background/industrial   | Weekly samples; period 7-12 months (differed per site) | Weekly samples, Nov. 1998 – May 1999 | PM <sub>10</sub>    | PM <sub>2.5</sub>                                                  | SO <sub>2</sub> , NO <sub>2</sub> , VOC                 |
| USA         | Study specific / routine monitoring (ozone some sites)                    | 1 fixed site in each community              | Background              | Daily samples, every other day                         | Continuous monitor, entire year      | PM <sub>10</sub>    | PM <sub>2.1</sub> , H <sup>+</sup> , SO <sub>4</sub> <sup>2-</sup> | SO <sub>2</sub> , O <sub>3</sub>                        |

CESAR includes study areas in Bulgaria, Czech Republic, Hungary, Poland and Slovakia

A More sites for NO<sub>2</sub> (five categories, from questionnaire); multiple sites for gaseous pollutants

B Two sites more traffic impact, sensitivity analysis agreed with investigators

**Table S2 Monitoring methods**

|             | PM principle     | Monitor          | Conversion to PM <sub>10</sub>                                                              | SO <sub>2</sub>  | NO <sub>2</sub>     |
|-------------|------------------|------------------|---------------------------------------------------------------------------------------------|------------------|---------------------|
| Switzerland | Gravimetric      | Harvard impactor | NA                                                                                          | UV Fluorescence* | Chemiluminescence** |
| Austria     | Beta attenuation | EberlineFH63I-N  | Co-located measurements several sites                                                       | UV Fluorescence  | Chemiluminescence   |
| CESAR       | Gravimetric      | Harvard impactor | NA                                                                                          | NA               | NA                  |
| Germany     | Beta attenuation | FAGFH-62-IN      | Co-located measurements with PM <sub>10</sub> in two of the areas one year later and Erfurt | UV Fluorescence  | NA                  |
| Italy       | Diverse          | Diverse          | Not possible, too diverse                                                                   |                  |                     |
| Netherlands | Gravimetric      | Harvard impactor | Co-located measurements PM <sub>2,5</sub> and PM <sub>10</sub> several schools during study | NA               | Palmes tube         |
| Russia      | Gravimetric      | Harvard impactor | NA                                                                                          | Ogawa badge      | Ogawa badge         |
| USA         | Gravimetric      | Harvard impactor | NA                                                                                          | Denuder          | NA                  |

NA not available

\* DOAS ([Differential Optical Absorption Spectroscopy](#)) at one site (Biel) and no data at one site (Langnau)

\*\* DOAS ([Differential Optical Absorption Spectroscopy](#)) at one site (Biel) and passive samplers (Langnau)

**Table S3** Results from meta-regression analyses stratified by study characteristic for phlegm (8 studies). Odds ratios per 10  $\mu\text{g}/\text{m}^3$   $\text{PM}_{10}$ .

| <b>Phlegm</b>                                                | <b>No. of studies</b> | <b>Mean odds ratio (95% CI)</b> | <b>p-heterogeneity</b> |
|--------------------------------------------------------------|-----------------------|---------------------------------|------------------------|
| <b>Original evidence of heterogeneity</b>                    |                       |                                 | 0.03                   |
| <b>Study design: Between- or within-towns (or a mixture)</b> |                       |                                 | 0.30                   |
| between towns                                                | 4                     | 1.09 (0.91 - 1.30)              |                        |
| within towns                                                 | 1                     | 1.06 (0.96 - 1.16)              |                        |
| mixture                                                      | 3                     | 1.46 (1.17 - 1.82)              |                        |
| <b>Season of questionnaire</b>                               |                       |                                 | 0.03                   |
| <2/3 in spring                                               | 3                     | 1.22 (0.83 - 1.80)              |                        |
| 2/3+ in spring                                               | 5                     | 1.15 (1.00 - 1.33)              |                        |
| <b>Variability of date of questionnaire</b>                  |                       |                                 | 0.01                   |
| high variability                                             | 1                     | 1.41 (0.64 - 3.13)              |                        |
| low variability                                              | 7                     | 1.14 (1.01 - 1.30)              |                        |
| <b>East or West<sup>5</sup></b>                              |                       |                                 | 0.03                   |
| East                                                         | 6                     | 1.21 (1.04 - 1.40)              |                        |
| West                                                         | 2                     | 0.98 (0.84 - 1.14)              |                        |
| <b>Period of study</b>                                       |                       |                                 | 0.04                   |
| pre 95 studies                                               | 1                     | 0.97(0.83 - 1.13)               |                        |
| 95 onwards                                                   | 7                     | 1.21(1.05 - 1.39)               |                        |
| <b>Response rate</b>                                         |                       |                                 | 0.01                   |
| response rate 80+%                                           | 3                     | 1.18(0.84 - 1.66)               |                        |
| response rate <80%                                           | 5                     | 1.16(1.00 - 1.35)               |                        |
| <b>Response rate variability</b>                             |                       |                                 | 0.01                   |
| low variability                                              | 5                     | 1.18(0.98 - 1.41)               |                        |
| med. variability                                             | 2                     | 1.16(0.86 - 1.57)               |                        |
| high variability                                             | 1                     | 1.41(0.64 - 3.13)               |                        |
| <b>Proportion of young children (aged 6-8)</b>               |                       |                                 | 0.01                   |
| low (<20%)                                                   | 2                     | 1.20(0.74 - 1.94)               |                        |
| Medium                                                       | 6                     | 1.15(1.01 - 1.32)               |                        |

**Table S4 Combined estimates of PM<sub>10</sub> effect by age-group and gender.**

| Symptom                                 | Age                           |                              | Gender                        |                               |
|-----------------------------------------|-------------------------------|------------------------------|-------------------------------|-------------------------------|
|                                         | Older children<br>(9 - 12 yr) | Young children<br>(6- 8 yr)  | Boys                          | Girls                         |
| <b>Wheeze</b>                           | 1.00(0.95-1.07)               | 0.99(0.89-1.11)              | 1.02 (0.92-1.13) <sup>H</sup> | 0.99 (0.92-1.06)              |
| <b>Asthma</b>                           | 1.05(0.98-1.14)               | 0.98(0.88-1.09)              | 1.01 (0.90-1.13)              | 1.03 (0.94-1.13)              |
| <b>Bronchitis</b>                       | 1.06(1.00-1.13)               | 1.12(0.98-1.27)              | 1.08 (0.98-1.18)              | 1.06 (0.96-1.18)              |
| <b>Phlegm</b>                           | 1.16(1.00-1.35) <sup>H</sup>  | 1.13(0.91-1.41) <sup>H</sup> | 1.09 (0.99-1.20)              | 1.13 (0.98-1.32) <sup>H</sup> |
| <b>Nocturnal cough</b>                  | 1.14(1.02-1.29) <sup>H</sup>  | 1.15(0.97-1.36) <sup>H</sup> | 1.20 (1.02-1.41) <sup>H</sup> | 1.08 (0.93-1.27) <sup>H</sup> |
| <b>Morning cough</b>                    | 1.16(1.03-1.31) <sup>H</sup>  | 1.11(0.95-1.29) <sup>H</sup> | 1.14 (1.02-1.27) <sup>H</sup> | 1.12 (0.98-1.28) <sup>H</sup> |
| <b>Hay fever</b>                        | 1.03(0.95-1.11)               | 0.97(0.84-1.11) <sup>H</sup> | 1.08 (0.90-1.30)              | 1.36 (1.02-1.83)              |
| <b>Sensitivity to inhaled allergens</b> | 1.30(1.00-1.68)               | 1.04(0.79-1.36)              | 1.01 (0.91-1.13) <sup>H</sup> | 1.03 (0.95-1.12)              |
| <b>Itchy rash</b>                       | 1.07(0.96-1.20)               | 1.03(0.87-1.22) <sup>H</sup> | 1.06 (0.91-1.24) <sup>H</sup> | 1.06 (0.95-1.18)              |
| <b>Woken by wheeze</b>                  | 0.99(0.89-1.10)               | 1.07(0.96-1.21)              | 1.07 (0.95-1.21)              | 0.94 (0.86-1.04)              |
| <b>Allergy to pets</b>                  | 1.29(0.95-1.74) <sup>H</sup>  | 1.00(0.81-1.23)              | 1.26 (0.97-1.63) <sup>H</sup> | 1.08 (0.91-1.28)              |

Combined effect estimates calculated from country-specific estimates using random effects model.

'H' indicates evidence of between study heterogeneity (p<0.10)

Odds ratios and 95% confidence intervals are per 10 µg/m<sup>3</sup> PM<sub>10</sub>

**Table S5 Description of lung function data**

|                                             | <b>Austria</b> | <b>Czech Republic</b> | <b>Germany</b> | <b>Hungary</b> | <b>Netherlands</b> | <b>North America</b> | <b>Poland</b> | <b>Slovakia</b> |
|---------------------------------------------|----------------|-----------------------|----------------|----------------|--------------------|----------------------|---------------|-----------------|
| N*                                          | 2,898          | 806                   | 1,788          | 1,260          | 1,735              | 12,737               | 615           | 970             |
| Age                                         |                |                       |                |                |                    |                      |               |                 |
| 6-9 years (%)                               | 100            | 17.5                  | 56.8           | 11.9           | 50.1               | 42.3                 | 34.2          | 24.0            |
| 10-12 yr (%)                                | 0              | 82.5                  | 43.2           | 88.1           | 49.9               | 47.7                 | 65.8          | 76.0            |
| Height (m)**                                | 1.25 (0.64)    | 1.44 (0.69)           | 1.41 (0.15)    | 1.46 (0.71)    | 1.43 (0.10)        | 1.42 (0.76)          | 1.41 (0.70)   | 1.45 (0.73)     |
| Weight (kg)**                               | 26 (5)         | 38 (8)                | 35 (12)        | 38 (9)         | 36 (9)             | 39 (10)              | 36 (8)        | 37 (8)          |
|                                             |                |                       |                |                |                    |                      |               |                 |
| FVC (l)**                                   | 1.44 (0.26)    | 2.49 (0.37)           | 2.39 (0.71)    | 2.50 (0.41)    | 2.38 (0.51)        | 2.49 (0.43)          | 2.31 (0.40)   | 2.48 (0.40)     |
| FEV <sub>1</sub> (l)**                      | 1.35 (0.23)    | 2.18 (0.31)           | 2.20 (0.59)    | 2.23 (0.35)    | 2.11 (0.43)        | 2.13 (0.36)          | 2.04 (0.33)   | 2.21 (0.34)     |
| FEF <sub>25-75</sub> (l.s <sup>-1</sup> )** | 1.92 (0.48)    | 2.54 (0.58)           | -              | 2.73 (0.59)    | 2.35 (0.65)        | 2.37 (0.62)          | 2.46 (0.57)   | 2.68 (0.62)     |
| PEF (l.s <sup>-1</sup> )**                  | 3.03 (0.62)    | 4.50 (0.78)           | 4.30 (1.27)    | 4.78 (0.78)    | 4.56 (1.07)        | 4.65 (0.92)          | 4.43 (0.78)   | 4.62 (0.89)     |
|                                             |                |                       |                |                |                    |                      |               |                 |
| FVC%pred.***                                | 86 (10)        | 100 (9)               | 100 (11)       | 97 (11)        | 98 (11)            | 104 (11)             | 98 (11)       | 99 (11)         |
| FEV <sub>1</sub> %pred***                   | 90 (11)        | 101 (10)              | 103 (12)       | 100 (11)       | 99 (11)            | 102 (12)             | 100 (10)      | 101 (11)        |
| FEF <sub>25-75</sub> %pred***               | 102 (24)       | 98 (21)               |                | 103 (20)       | 93 (21)            | 95 (23)              | 99 (21)       | 103 (22)        |

\* number of children with valid lung function test

\*\* Mean and standard deviation in parentheses

\*\*\* Mean and standard deviation in parentheses of percent predicted lung function. Predicted using equations from Stanojevic (2009)<sup>2</sup>

**Table S6**                      **Combined estimates for the fully adjusted effect of 10 µg/m<sup>3</sup> increase in PM<sub>10</sub> on lung function**

|                                                               | <b>FVC (% diff and 95% CI)</b> | <b>FEV<sub>1</sub> (% diff and 95% CI)</b> | <b>FEF<sub>25-75</sub> (% diff and 95% CI)</b> | <b>PEF (% diff and 95% CI)</b> |
|---------------------------------------------------------------|--------------------------------|--------------------------------------------|------------------------------------------------|--------------------------------|
| Original analysis, all centres                                | 0.1 (-0.6, 0.8)                | 0.3 (-0.5, 1.1)                            | 0.7 (-0.8, 2.3)                                | 0.0 (1.2, 1.3)                 |
| Original analysis, without CESAR centres**                    | 0.2 (-1.0, 1.3)                | 0.0 (-0.9, 0.9)                            | -0.5 (-1.6, 0.6)                               | -0.4 (-2.0, 1.2)               |
| Analysis with Stanojevic prediction equations, all centres*** | -0.0, (-0.7, 0.7)              | 0.2 (-0.6, 1.1)                            | 0.8 (-0.7, 2.2)                                | NA                             |

\* p < 0.05

\*\* exclusion because of small number of valid tests

\*\*\* percent predicted lung function dependent variable. Prediction using equations from Stanojevic (2009)<sup>2</sup>

Combined effect estimates calculated from country-specific estimates using random effects model.

NA=not available

## References online supplement

1. Janssen NAH, van Vliet PHN, Aarts F, Harssema H, Brunekreef B. Assessment of exposure to traffic related air pollution of children attending schools near motorways. *Atmospheric Environment* 2001;35, 22: 3875-3884.
2. Stanojevic S, Wade A, Cole TJ, Lum S, Custovic A, Silverman M, Hall GL, Welsh L, Kirkby J, Nystad W, Badier M, Davis S, Turner S, Piccioni P, Viložni D, Eigen H, Vlachos-Mayer H, Zheng J, Tomalak W, Jones M, Hankinson JL, Stocks J. Spirometry centile charts for young Caucasian children: The asthma UK collaborative initiative. *American Journal of Respiratory and Critical Care Medicine* 2009; 180: 547-552.
